# Supplementary material for: Dual Role of ACBD6 in the Acylation Remodeling of Lipids and Proteins
Source: MDPI journal article supplement (doi:10.3390/biom12121726), 2022-11-22
Supplement: s1 [file s1]

# Validation and Invalidation of Chemical Probes for the Human *N*-myristoyltransferases

Wouter W. Kallemeijn,<sup>1,4</sup> Gregor A. Lueg,<sup>1,2,4</sup> Monica Faronato,<sup>1,2</sup> Kate Hadavizadeh,<sup>1</sup> Andrea Goya Grocin,<sup>1</sup> Ok-Ryul Song,<sup>2</sup> Michael Howell,<sup>2</sup> Dinis P. Calado,<sup>2,3</sup> and Edward W. Tate<sup>1,2,5,\*</sup>

<sup>1</sup>Department of Chemistry, Imperial College London, Molecular Research Science Hub, 80 Wood Lane, London W12 0BZ, UK

<sup>2</sup>The Francis Crick Institute, 1 Midland Road, London NW1 1AT, UK

<sup>3</sup>Peter Gorer Department of Immunobiology, School of Immunology & Microbial Sciences, King's College London, London SE1 9RT, UK

<sup>4</sup>These authors contributed equally

<sup>5</sup>Lead Contact

\*Correspondence: [e.tate@imperial.ac.uk](mailto:e.tate@imperial.ac.uk)

<https://doi.org/10.1016/j.chembiol.2019.03.006>

Snapshot of Figure 2, panel B and D. Effects on Cellular *N*-myristoylation, *N*-myristoyltransferases, and Substrate ARL1 in Living Cells

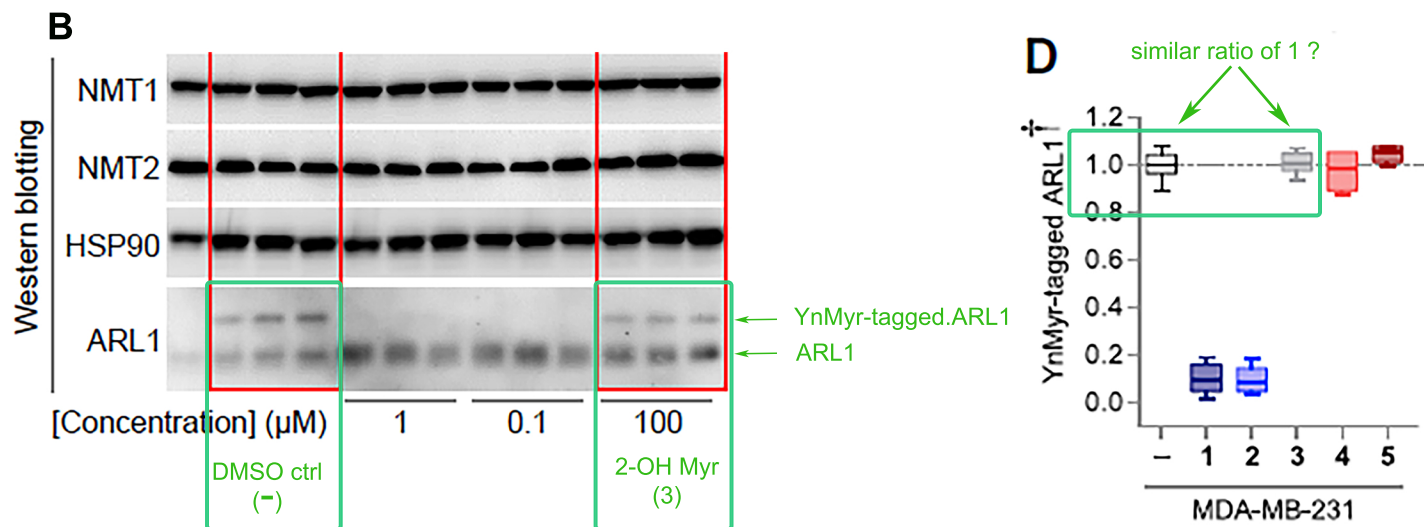

(Additions by Soupene et al are indicated in green colored text)
